# Supplementary material for: Short-Term Effects of the Particulate Pollutants Contained in Saharan Dust on the Visits of Children to the Emergency Department due to Asthmatic Conditions in Guadeloupe (French Archipelago of the Caribbean)
Source: PLoS One. 2014 Mar 6;9(3):e91136. doi: 10.1371/journal.pone.0091136 (PMC3946322; doi:10.1371/journal.pone.0091136)
Supplement: Table S4 — Comparison of IR% (excess risk percentages) between groups of children 5–8 years and 12–15 years during periods of Saharan dust for PM10 and PM2.5–10 at lag 0 and lag (0–1). (DOCX) [file pone.0091136.s004.docx]

Table S4

| **Particulate matter** | **Age of children** | | **p-Value** |
| --- | --- | --- | --- |
|  | **5-8 years**  IR% CI95% | **12-15 years**  IR% CI95% |  |
| **PM10 lag 0** | 9.5 (6.8-12.2) | 8.0 (6.4-9.6) | 0.75 |
| **PM10 lag (0-1)** | 5.7 (4.4-7.1) | 4.8 (3.8-5.9) | 0.98 |
| **PM2.5-10 lag 0** | 6.2 (4.4-8.1) | 7.5 (5.0-10.3) | 0.37 |
| **PM2.5-10 lag (0-1)** | 5.9 (5.0-7.2) | 4.4 (2.8-7.0) | 0.74 |
